# Supplementary material for: Improved estimation of diurnal variations in near-global PBLH through a hybrid WCT and transfer learning approach
Source: Copernicus journal article supplement (doi:10.5194/amt-19-1059-2026), 2026-02-16
Supplement: Supplementary file 1 [file amt-19-1059-2026-supplement.pdf]

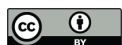

*Supplement of*

## **Improved estimation of diurnal variations in near-global PBLH through a hybrid WCT and transfer learning approach**

**Yarong Li et al.**

*Correspondence to:* Jianjun He ([hejianjun@cma.gov.cn](mailto:hejianjun@cma.gov.cn))

The copyright of individual parts of the supplement might differ from the article licence.

**Table S1.** Accuracy (%) and MAE (m) for the first five peaks with different dilation factors range from 240 to 960 m.

|              | Dilation (m) | 240   | 360   | 480   | 600   | 720   | 840   | 960   |
|--------------|--------------|-------|-------|-------|-------|-------|-------|-------|
| Accuracy (%) | First Peak   | 29.67 | 32.57 | 35.77 | 37.8  | 38.77 | 39.18 | 38.41 |
|              | Second Peak  | 17.58 | 17.21 | 17.07 | 16.16 | 16.92 | 16.72 | 15.65 |
|              | Third Peak   | 13.87 | 14.23 | 13.62 | 13.31 | 13.01 | 12.25 | 10.11 |
|              | Fourth Peak  | 14.68 | 12.91 | 11.16 | 12.04 | 9.1   | 4.27  | 0.56  |
|              | Fifth Peak   | 12.65 | 11.89 | 12.55 | 6.55  | 1.37  | 0     | 0     |
|              | Total        | 88.45 | 88.81 | 90.17 | 85.86 | 79.17 | 72.42 | 64.73 |
| MAB (m)      | First Peak   | 201.1 | 212.6 | 225.8 | 240.9 | 255.6 | 271.3 | 278.6 |
|              | Second Peak  | 225.2 | 245.8 | 255.0 | 271.5 | 280.8 | 298.6 | 300.2 |
|              | Third Peak   | 224.8 | 215.5 | 233.8 | 252.9 | 294.9 | 300.5 | 305.6 |
|              | Fourth Peak  | 214.9 | 225.0 | 232.0 | 248.7 | 244.3 | 250.4 | 236.8 |
|              | Fifth Peak   | 212.3 | 220.7 | 241.4 | 217.1 | 289.7 | -     | -     |

**Table S2.** Hit rate (%) of the first five peaks when setting different threshold for calculating accuracy.

| Threshold (m) | 300   | 400   | 500   | 600   | 700   |
|---------------|-------|-------|-------|-------|-------|
| First Peak    | 30.39 | 33.59 | 35.77 | 36.99 | 38.11 |
| Second Peak   | 13.31 | 15.8  | 16.97 | 17.78 | 18.19 |
| Third Peak    | 11.38 | 12.65 | 13.62 | 14.23 | 14.63 |
| Fourth Peak   | 10.26 | 11.38 | 12.55 | 12.75 | 13.06 |
| Fifth Peak    | 8.74  | 9.6   | 10.16 | 10.57 | 10.87 |

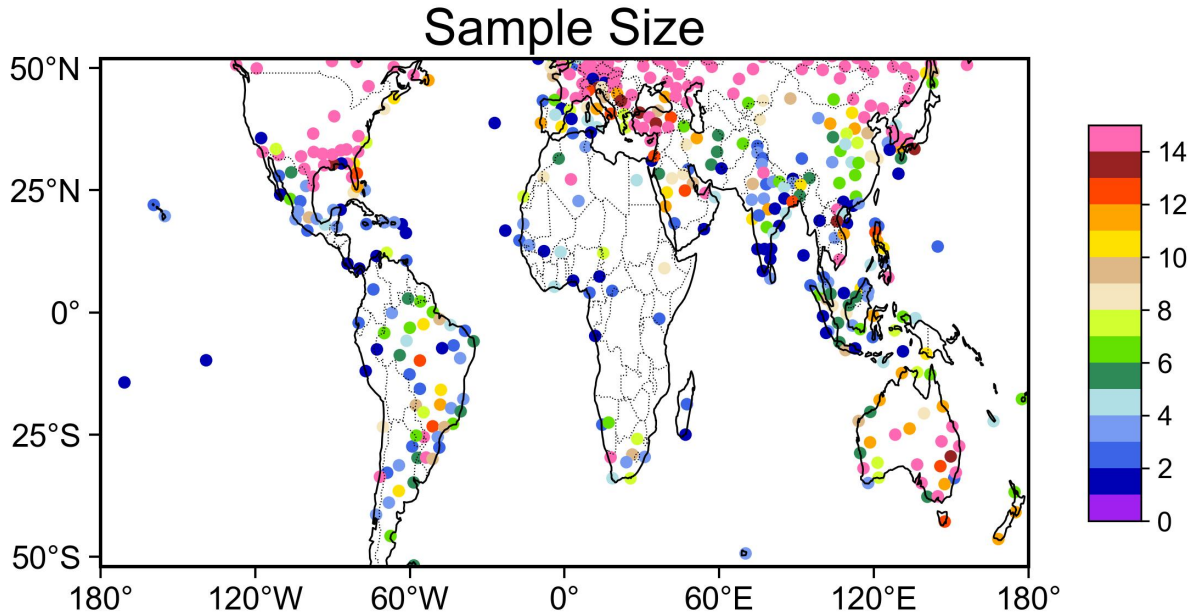

**Fig. S1.** Numbers of matched samples between CATS orbits and radiosonde sites.

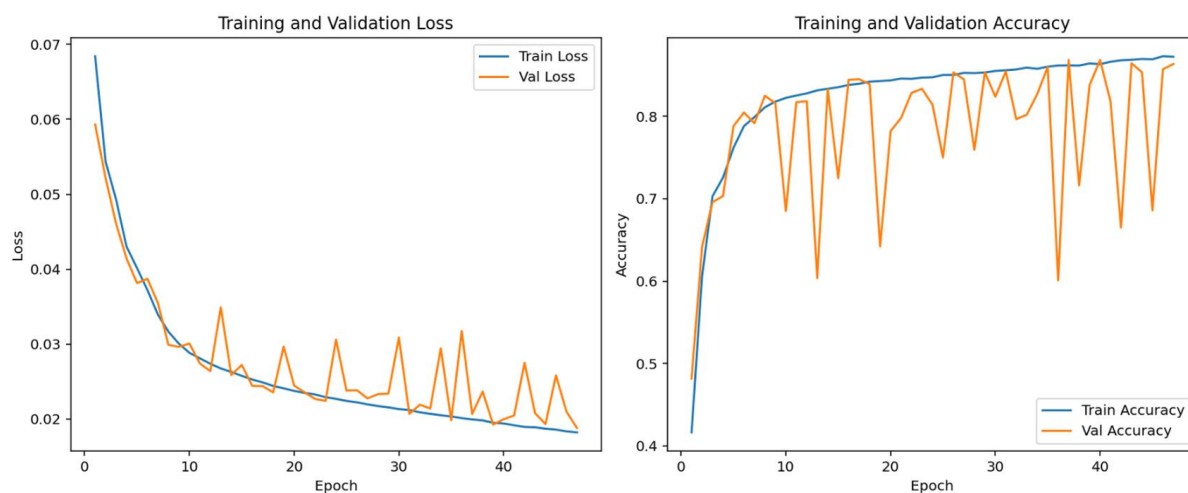

**Fig. S2.** Training curves for pre-trained model.

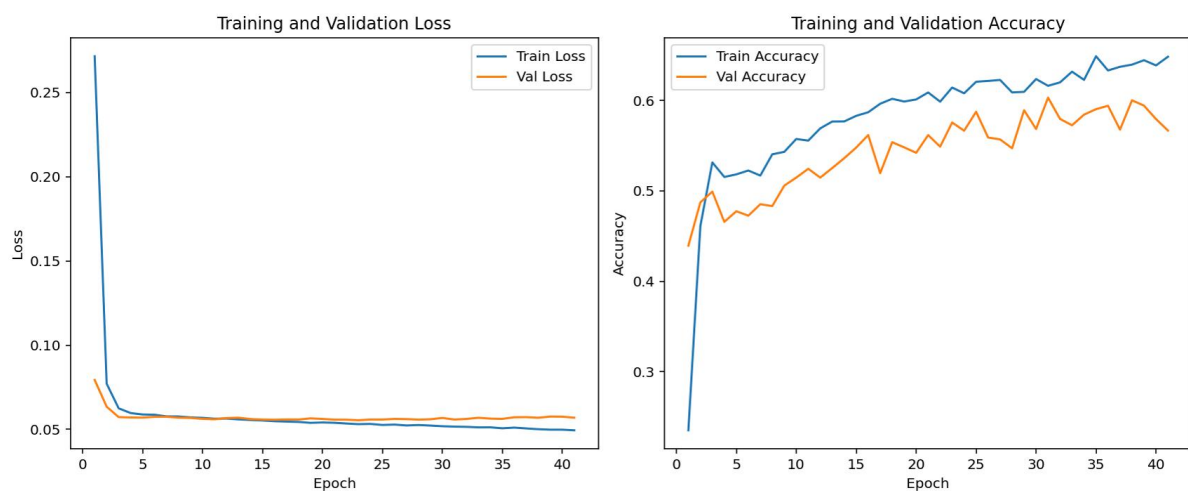

**Fig. S3.** Same as Fig. S2, but for training curves of base model, which is trained based on the dataset with target labels constrained by only radiosonde.

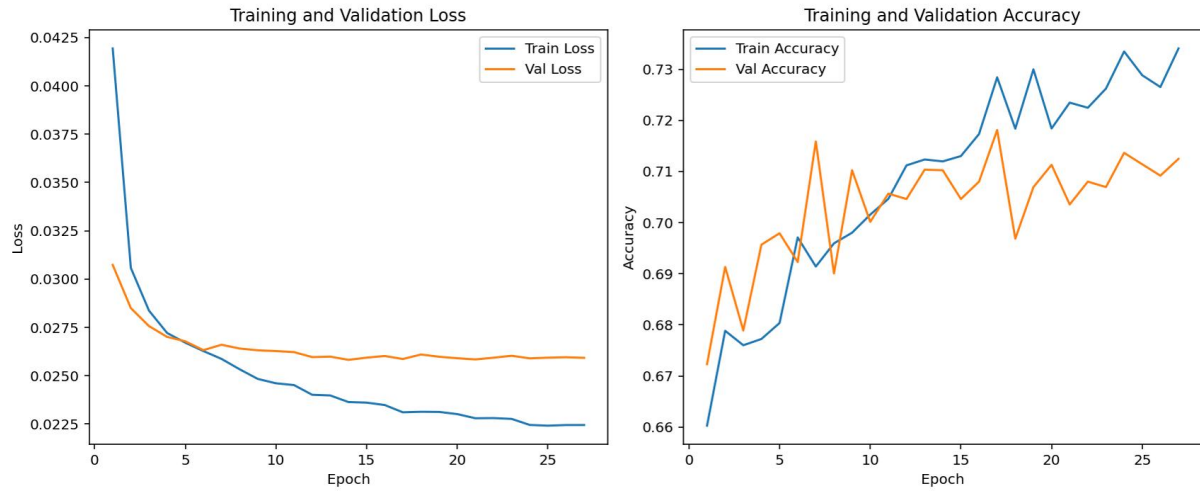

**Fig. S4.** Same as Fig. S2, but for curves when training the transfer model.

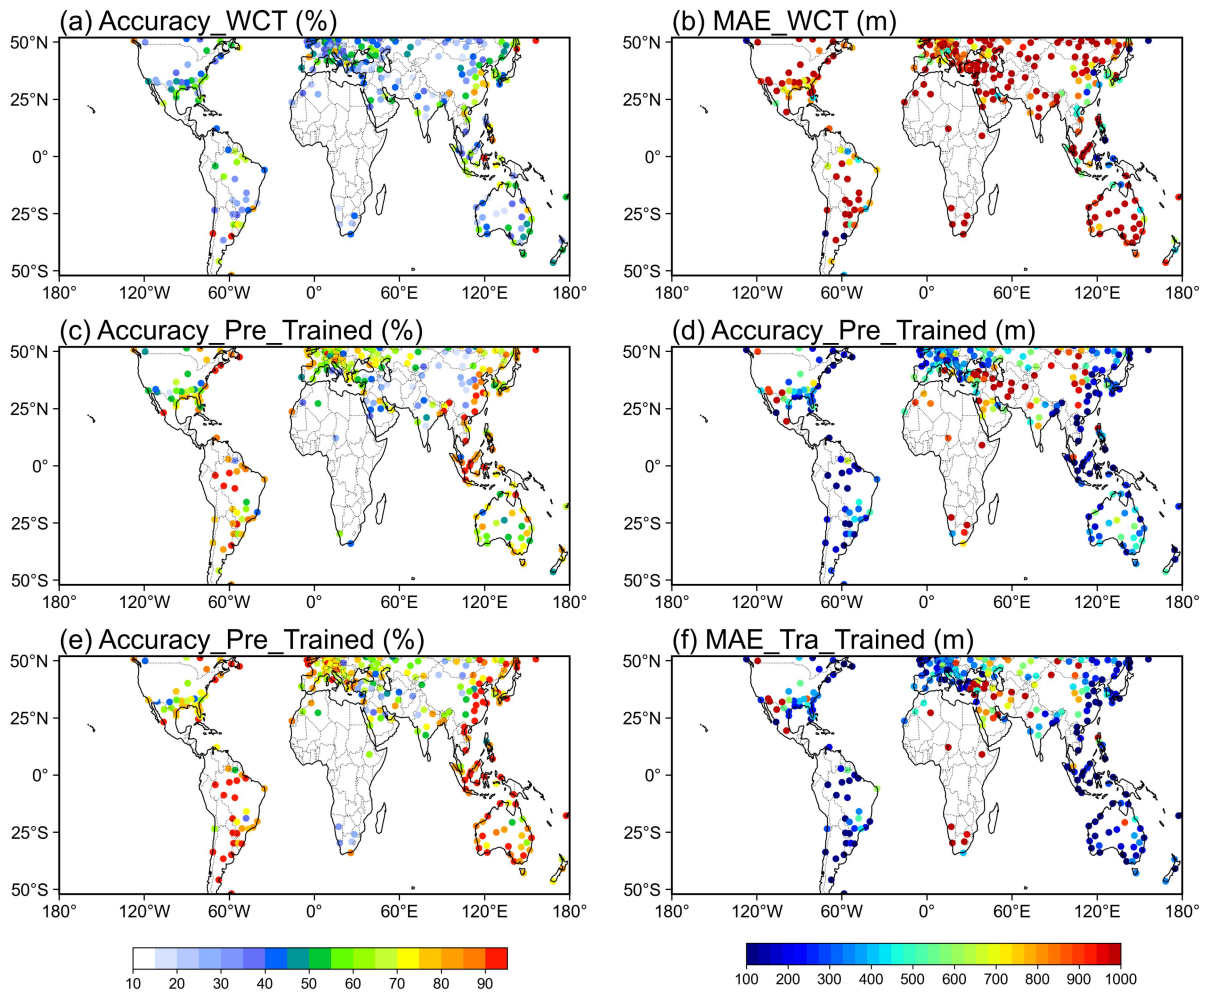

**Fig. S5.** Accuracy and MAE of the WCT (a-b), pre-train model (c-d), transfer model (e-f) when comparing against the radiosonde constrained PBLH labels.



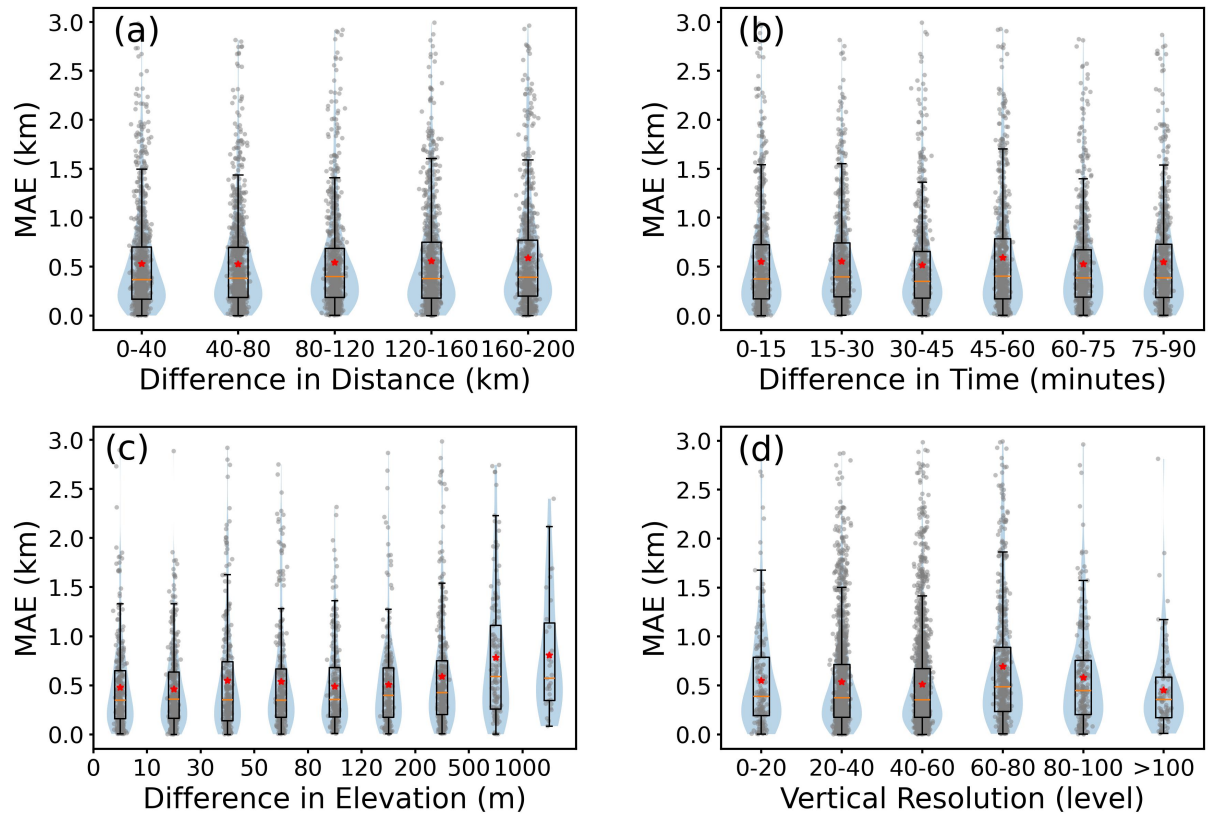

**Fig. S6.** Dependence of PBLH differences between the WCT and radiosonde on differences in distance (a), time (b), elevation (c), and vertical resolution of radiosonde (d).

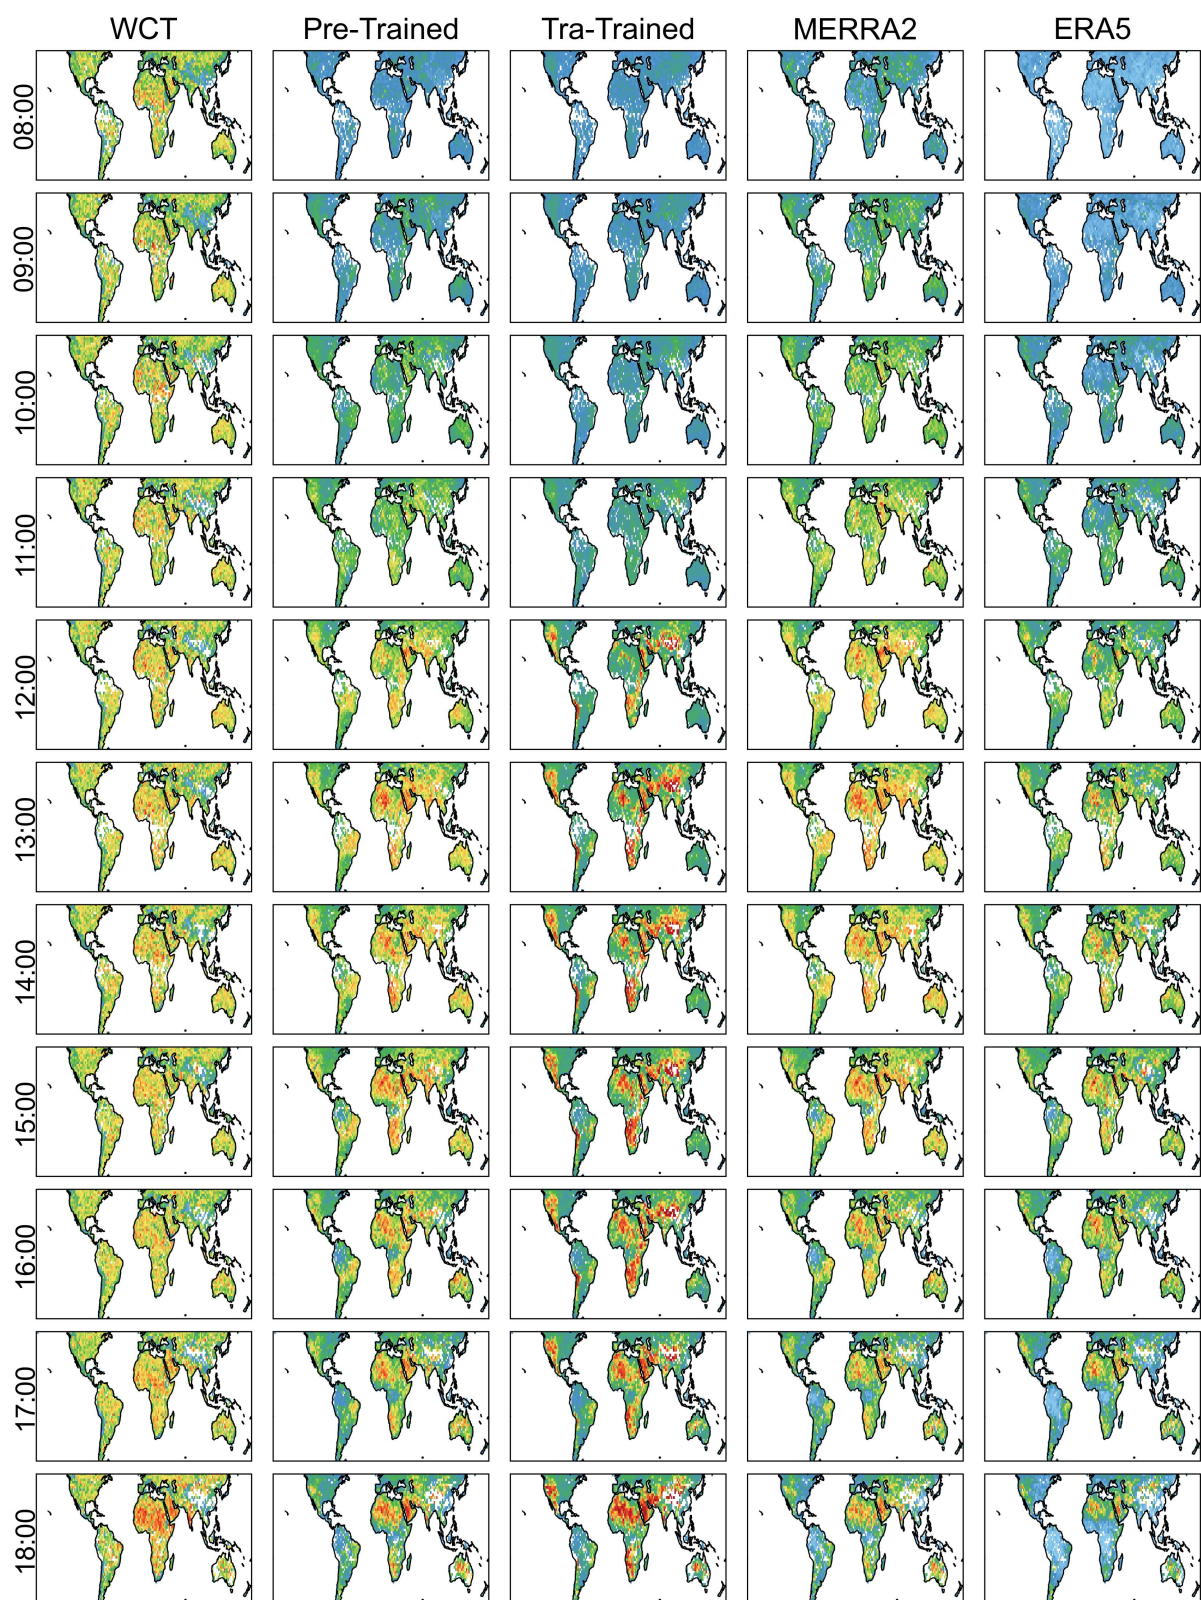

**Fig. S7.** Spatial distribution of hourly PBLH derived from the WCT, pre-trained model, transfer model, MERRA2, and ERA5 at each daily hour.

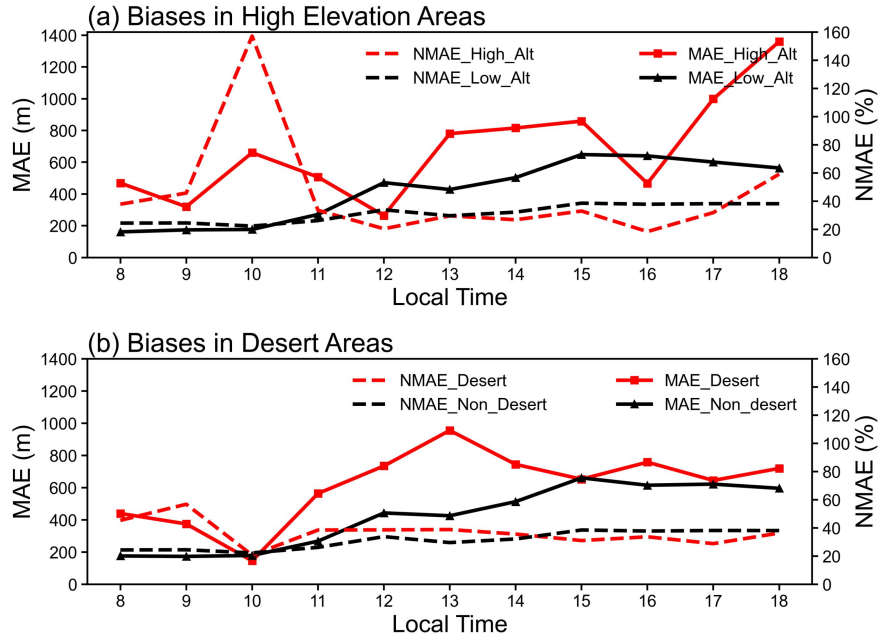

**Fig. S8.** Comparisons for MAE and NMAE of PBLH between high-altitude and low-altitude (a), and between deserts and non-deserts (b) at each daytime hour.

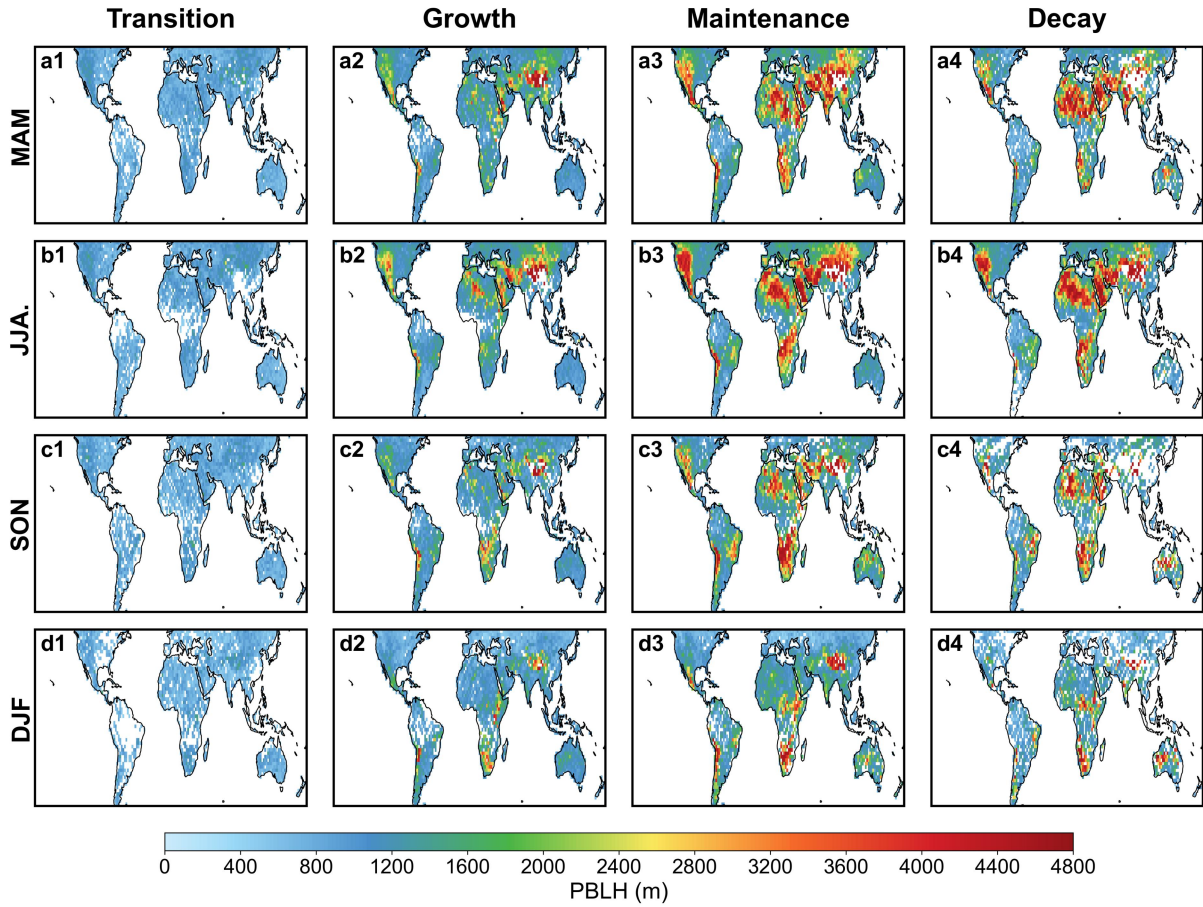

**Fig. S9.** Four evolution stages of PBLH derived from transfer model on the seasonal scale.



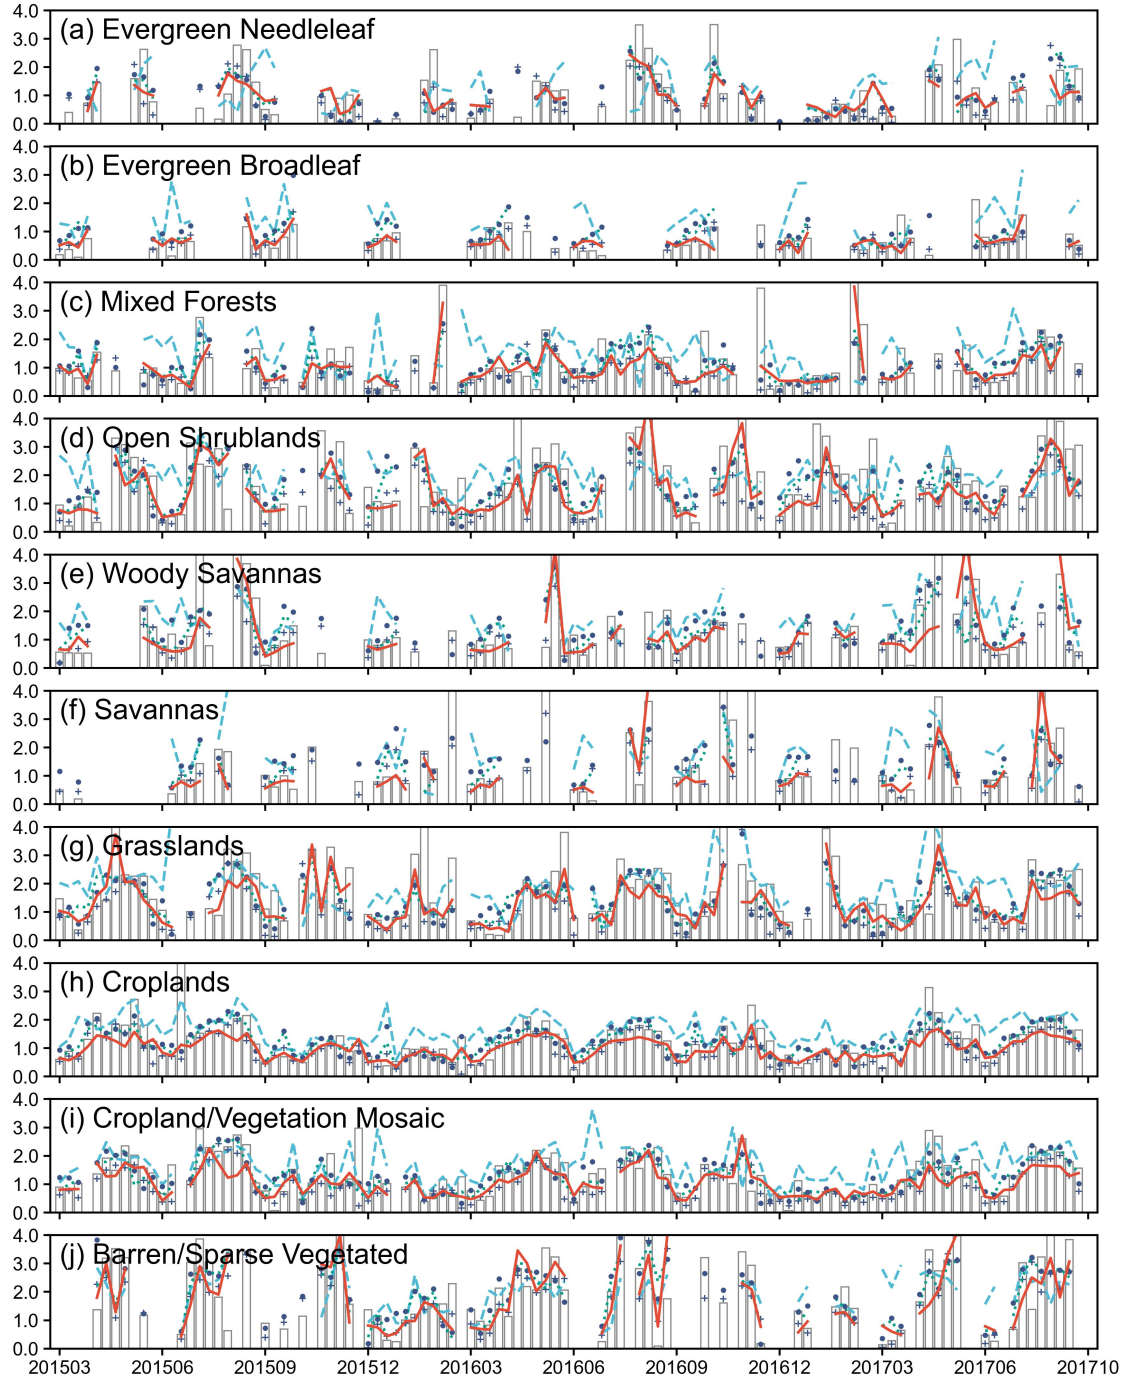

**Fig. S10.** Seasonally diurnal variations of PBLH on ten major land cover types, which are derived from radiosondes (columns), pre-train model (cyan dashed), transfer model (red solid), ERA5 (solid circle), and MERRA2 ('+').

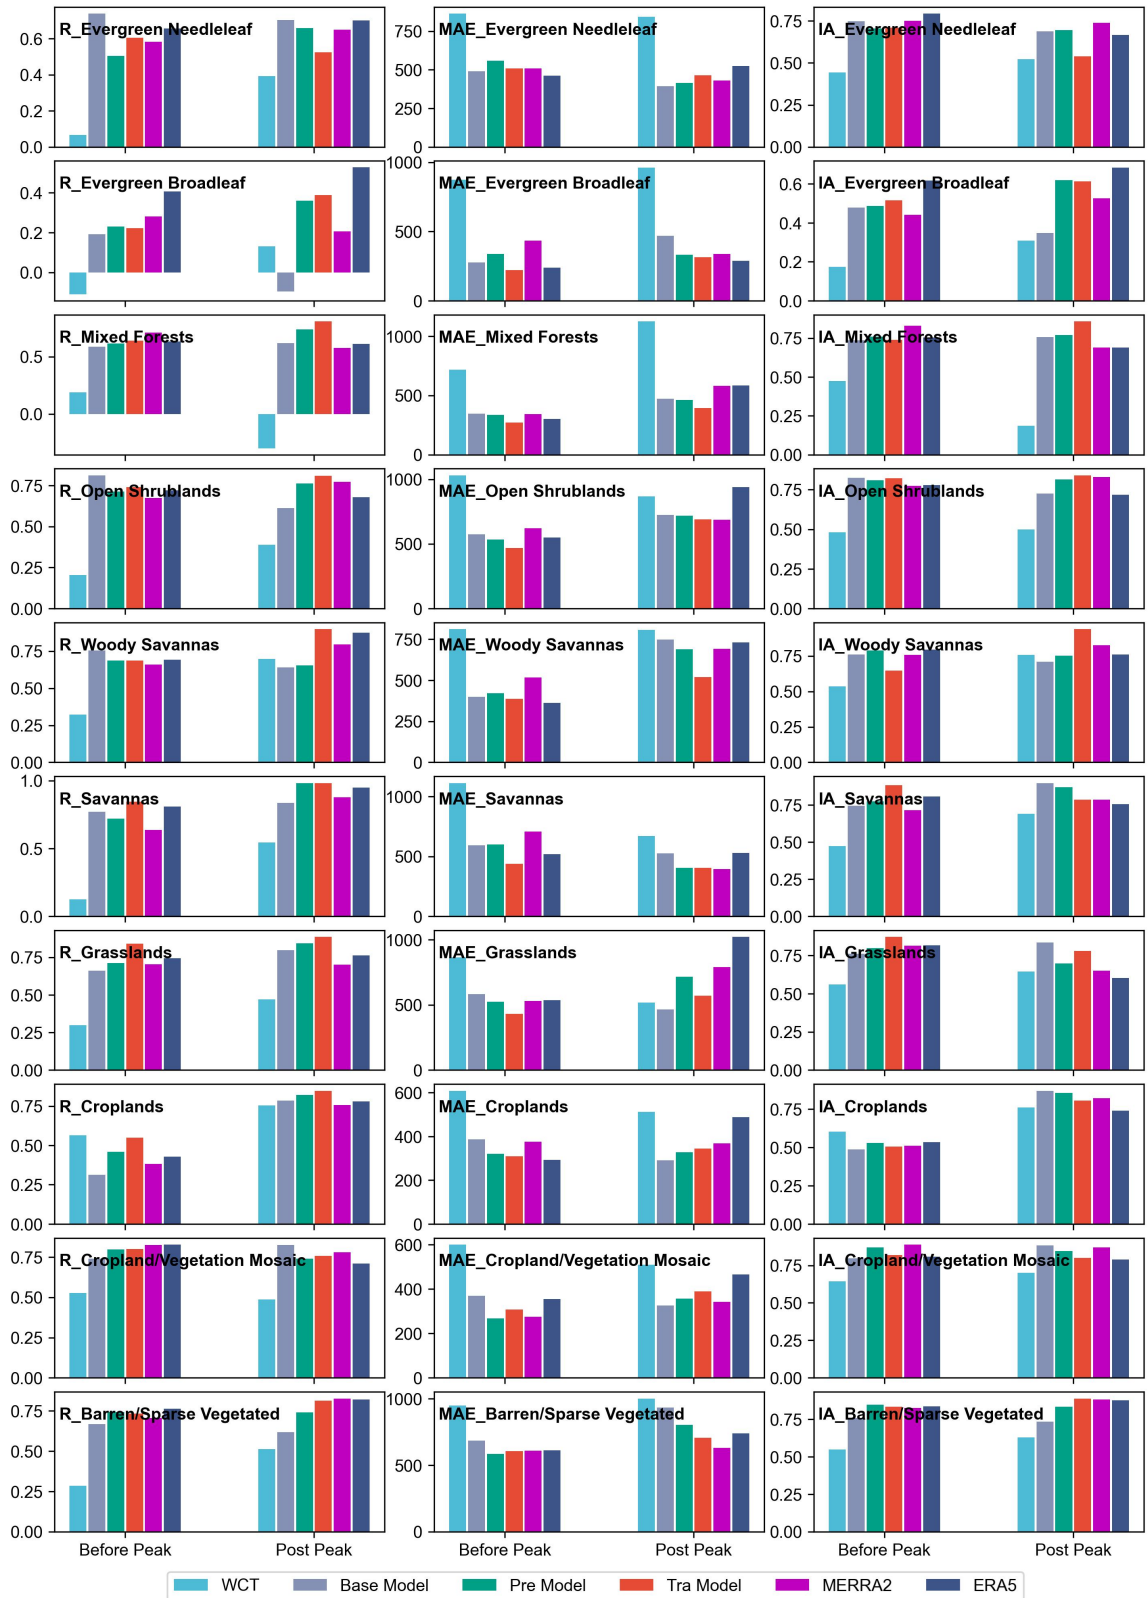

**Fig. S11.** R, MAE, and IA (index of agreement) between model/reanalysis predicted and radiosonde derived PBLH on ten major land cover types.
